# Supplementary material for: Deposition of a hydrophilic nanocomposite-based coating on silicone hydrogel through a laser process to minimize UV exposure and bacterial contamination
Source: Royal Society of Chemistry journal article supplement (doi:10.1039/c6ra12991a), 2016-01-01
Supplement: c6ra12991a1.pdf [file c6ra12991a1.pdf]

## Supporting materials

### Title: Deposition of Hydrophilic Nanocomposite-based Coating on Silicone Hydrogel through a Laser Process to Minimize UV Exposure and Bacterial Contamination

Guobang Huang, Wai Hei Tse, and Jin Zhang \*

S1. FTIR spectra of Ag-PVP nanocomposites with/without MAPLE

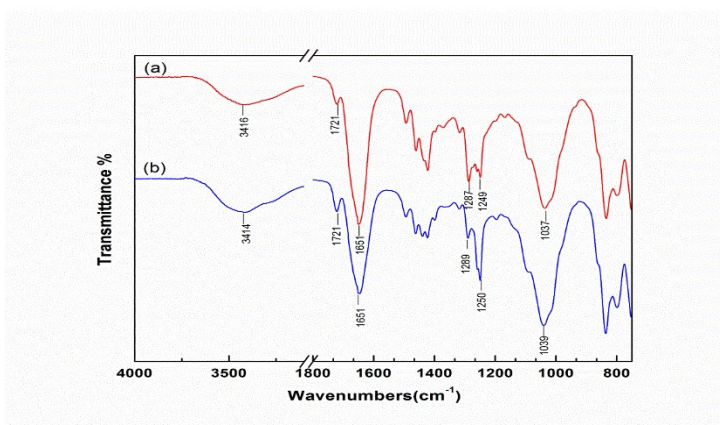

Figure S1. FTIR spectra of Ag-PVP nanocomposites by (a) MAPLE and (b) Drop-Air-dried method.

S2. UV-vis measurement

Samples of silicone hydrogel with Ag-PVP coating were measured by UV-vis spectrometry at 6-month time interval. The UV-vis spectra do not change as shown in Figure S2.

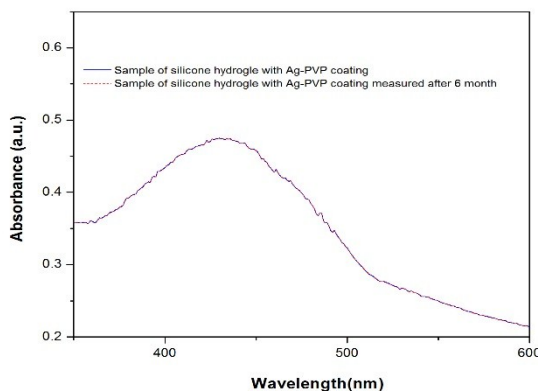

Figure S2. UV-vis spectra of the sample of silicone hydrogel with Ag-PVP coating measured at 6 month time interval.
